# Supplementary material for: KPI-based standards benchmarking for the preference of different analytical approaches developed for simultaneous determination of ciprofloxacin and hydrocortisone: A SWOT case study
Source: publisher site journal article supplement (doi:10.1515/revac-2023-0077), 2024-01-01
Supplement: Supplementary file 1 [file revac-2023-0077_sm.pdf]

## Supplementary material

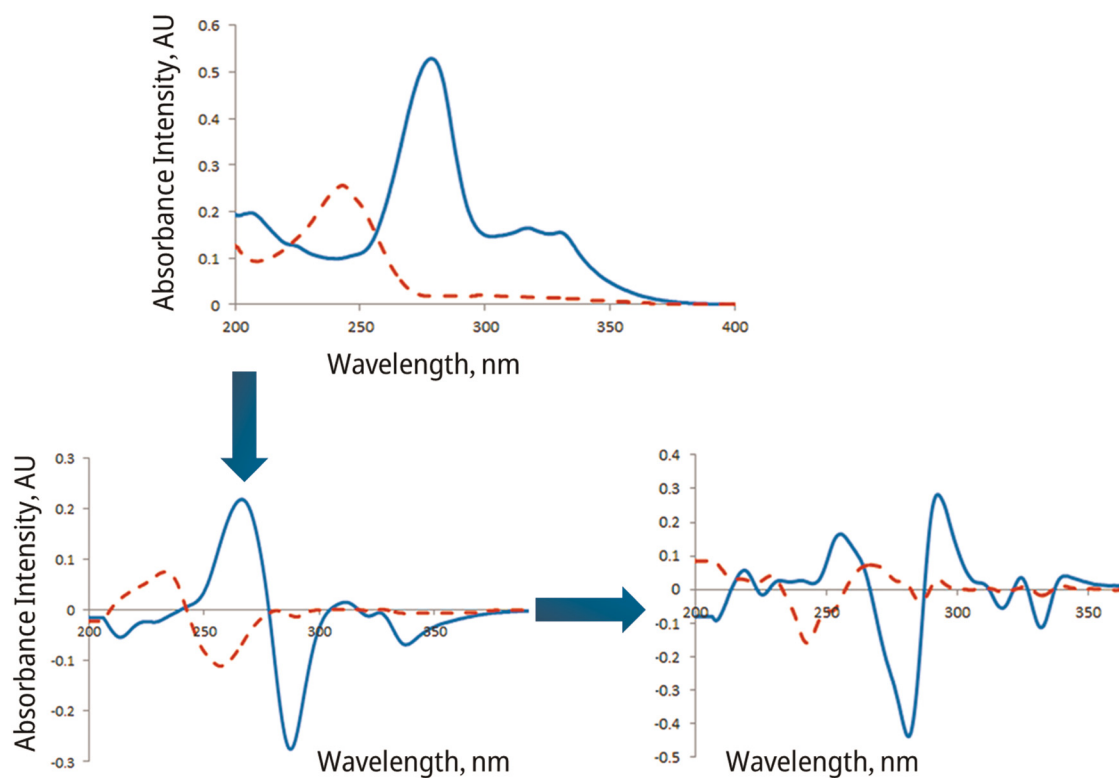

**Figure S1:** (a–c): Zero order UV-spectra, D0, (a). first derivative spectra, D1, (b). Second derivative spectra, D2, (c) of 5 µg/mL of each CIP (—) and HYD (----).

## Analytical Greenness report sheet

04/09/2023 14:54:31

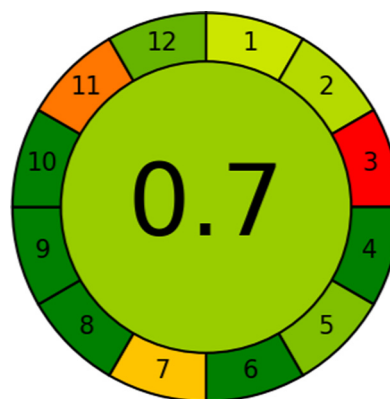

| Criteria                                                                                                                             | Score | Weight |
|--------------------------------------------------------------------------------------------------------------------------------------|-------|--------|
| 1. Direct analytical techniques should be applied to avoid sample treatment.                                                         | 0.6   | 2      |
| 2. Minimal sample size and minimal number of samples are goals.                                                                      | 0.65  | 2      |
| 3. If possible, measurements should be performed in situ.                                                                            | 0.0   | 2      |
| 4. Integration of analytical processes and operations saves energy and reduces the use of reagents.                                  | 1.0   | 2      |
| 5. Automated and miniaturized methods should be selected.                                                                            | 0.75  | 2      |
| 6. Derivatization should be avoided.                                                                                                 | 1.0   | 2      |
| 7. Generation of a large volume of analytical waste should be avoided, and proper management of analytical waste should be provided. | 0.39  | 2      |
| 8. Multi-analyte or multi-parameter methods are preferred versus methods using one analyte at a time.                                | 1.0   | 2      |
| 9. The use of energy should be minimized.                                                                                            | 1.0   | 2      |
| 10. Reagents obtained from renewable sources should be preferred.                                                                    | 1.0   | 2      |
| 11. Toxic reagents should be eliminated or replaced.                                                                                 | 0.23  | 2      |
| 12. Operator's safety should be increased.                                                                                           | 0.8   | 2      |

**Figure S2:** The Analytical Greenness report sheet for the UV-spectrophotometric method.

## Analytical Greenness report sheet

04/09/2023 15:05:18

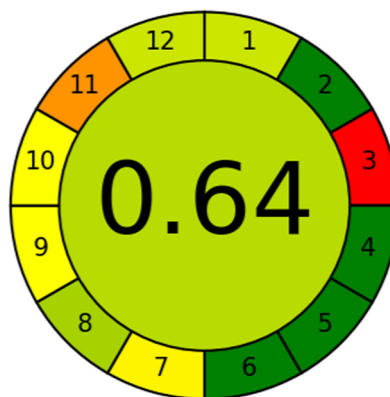

| Criteria                                                                                                                             | Score | Weight |
|--------------------------------------------------------------------------------------------------------------------------------------|-------|--------|
| 1. Direct analytical techniques should be applied to avoid sample treatment.                                                         | 0.6   | 2      |
| 2. Minimal sample size and minimal number of samples are goals.                                                                      | 1.0   | 2      |
| 3. If possible, measurements should be performed in situ.                                                                            | 0.0   | 2      |
| 4. Integration of analytical processes and operations saves energy and reduces the use of reagents.                                  | 1.0   | 2      |
| 5. Automated and miniaturized methods should be selected.                                                                            | 1.0   | 2      |
| 6. Derivatization should be avoided.                                                                                                 | 1.0   | 2      |
| 7. Generation of a large volume of analytical waste should be avoided, and proper management of analytical waste should be provided. | 0.48  | 2      |
| 8. Multi-analyte or multi-parameter methods are preferred versus methods using one analyte at a time.                                | 0.68  | 2      |
| 9. The use of energy should be minimized.                                                                                            | 0.5   | 2      |
| 10. Reagents obtained from renewable sources should be preferred.                                                                    | 0.5   | 2      |
| 11. Toxic reagents should be eliminated or replaced.                                                                                 | 0.29  | 2      |
| 12. Operator's safety should be increased.                                                                                           | 0.6   | 2      |

**Figure S3:** The Analytical Greenness report sheet for the HPLC-UV method.

## Analytical Greenness report sheet

04/09/2023 15:03:00

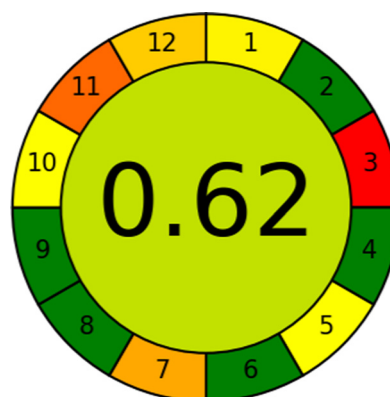

| Criteria                                                                                                                             | Score | Weight |
|--------------------------------------------------------------------------------------------------------------------------------------|-------|--------|
| 1. Direct analytical techniques should be applied to avoid sample treatment.                                                         | 0.48  | 2      |
| 2. Minimal sample size and minimal number of samples are goals.                                                                      | 1.0   | 2      |
| 3. If possible, measurements should be performed in situ.                                                                            | 0.0   | 2      |
| 4. Integration of analytical processes and operations saves energy and reduces the use of reagents.                                  | 1.0   | 2      |
| 5. Automated and miniaturized methods should be selected.                                                                            | 0.5   | 2      |
| 6. Derivatization should be avoided.                                                                                                 | 1.0   | 2      |
| 7. Generation of a large volume of analytical waste should be avoided, and proper management of analytical waste should be provided. | 0.33  | 2      |
| 8. Multi-analyte or multi-parameter methods are preferred versus methods using one analyte at a time.                                | 1.0   | 2      |
| 9. The use of energy should be minimized.                                                                                            | 1.0   | 2      |
| 10. Reagents obtained from renewable sources should be preferred.                                                                    | 0.5   | 2      |
| 11. Toxic reagents should be eliminated or replaced.                                                                                 | 0.2   | 2      |
| 12. Operator's safety should be increased.                                                                                           | 0.4   | 2      |

**Figure S4:** The Analytical Greenness report sheet for the TLC-spectrodensitometric method.

**Table S1:** SM: Building the calibration curves and derivatized the regression equations for both medications

| No. | The approach                                                                                         | The procedure for the regression equation                                                                                                                                                                                                                                                                                                                                                                                                                                                             |
|-----|------------------------------------------------------------------------------------------------------|-------------------------------------------------------------------------------------------------------------------------------------------------------------------------------------------------------------------------------------------------------------------------------------------------------------------------------------------------------------------------------------------------------------------------------------------------------------------------------------------------------|
| 1)  | Isoabsorptive point (Iso) [1,2]                                                                      | <p>The calibration curves were created by drawing the D0 absorbance for HYD at the isoabsorptive point, 256.2 nm (<math>\lambda_{iso}</math>), against the corresponding concentrations</p> <p>Using the solvent mixture as a blank, the second derivative, D2, was recorded for the CIP stored spectra (<math>\Delta\lambda = 8</math>). Plotting the peak amplitude of the D2 spectra for CIP at 256.2 nm against the corresponding concentrations allowed for constructing a calibration curve</p> |
| 2)  | Isoabsorptive point (Iso) method, with an absorbance ratio (AR); (Iso-AR) method [3]                 | Plotting the D0 absorbance for CIP at 330 nm against the appropriate concentrations for using the AR method. The calibration curve was created, and then the regression equation was calculated                                                                                                                                                                                                                                                                                                       |
| 3)  | The extended ratio subtraction (EXRS) method [4,5] depends on the ratio subtraction (RS) method [6]. | Plotting the D0 absorbance for CIP and HYD, respectively, against the corresponding concentrations at 278.6 and 243 nm                                                                                                                                                                                                                                                                                                                                                                                |
| 4)  | The ratio difference (RD) method                                                                     | The 5.0 $\mu\text{g/mL}$ HYD spectrum divided the stored CIP spectra, and the 6.0 $\mu\text{g/mL}$ CIP spectrum divided the HYD spectra. Then, plotting the difference between the amplitude ratio differences ( $\Delta P_{279.8-241.7}$ ) and ( $\Delta P_{241.7-221.5}$ ) for the CIP and HYD, respectively, against the corresponding concentrations allowed for the construction of calibration curves                                                                                           |
| 5)  | The mean centre concentrated ratio (MCR) method [4,7]                                                | The MC for both medications were obtained by mean centering with respect to wavelength using the ratio spectra exported from the RD method to the Matlab platform. To create calibration curves, the maximum peak amplitude of MC for CIP and HYD, respectively, was plotted against the corresponding concentrations at 279.8 and 241.7 nm                                                                                                                                                           |

**Table S2:** Theoretical aspects of UV-spectrophotometric manipulations for different approaches

| No. | The approach | The manipulation theory                                                                                                                                                                                                                                                                                                                                                                                                                                                                                                                                                                                                                                                                                                                                                                                                                                                                                                                                                                                                                                                                                                                                                                                                                                                                                                                                                                                                                                                   |
|-----|--------------|---------------------------------------------------------------------------------------------------------------------------------------------------------------------------------------------------------------------------------------------------------------------------------------------------------------------------------------------------------------------------------------------------------------------------------------------------------------------------------------------------------------------------------------------------------------------------------------------------------------------------------------------------------------------------------------------------------------------------------------------------------------------------------------------------------------------------------------------------------------------------------------------------------------------------------------------------------------------------------------------------------------------------------------------------------------------------------------------------------------------------------------------------------------------------------------------------------------------------------------------------------------------------------------------------------------------------------------------------------------------------------------------------------------------------------------------------------------------------|
| 1)  | Iso          | <p>Iso method, with a second derivative, for simultaneous determination of (X) and (Y) in their binary mixtures (µg/mL). The combination of drugs functions as a single unit. It provides the same absorbance value as a pure drug at the isoabsorptive point (<math>\lambda_{iso}</math>). Thus, the total concentration of both (X) and (Y) in the mixture could be calculated by measuring the absorbance value (<math>A_{iso}</math>) at the selected (<math>\lambda_{iso}</math>). In contrast, the concentration of (X) in the mixture could be calculated independently by using another spectrophotometric method. Therefore, by subtracting, the concentration of (Y) could be determined</p> $A_{iso} = A_X + A_Y = a_{X_{iso}} C_X + a_{Y_{iso}} C_Y = a_{iso} (C_X + C_Y) \text{ at } \lambda_{iso} \quad (S1)$ <p>Where <math>a_{X_{iso}} = a_{Y_{iso}}</math>; <math>A_X = a_X C_X</math>; and Then <math>C_Y = (C_X + C_Y) - C_X</math>, for more details refer to reference [8]</p>                                                                                                                                                                                                                                                                                                                                                                                                                                                                       |
| 2)  | Iso-AR       | <p>Using the following equations, the AR establishes a linear relationship between the relative concentration of a binary mixture of (X) and (Y) and its absorbance ratio value:</p> $C_X = \left( \frac{Q_1 - b_1}{a_1} \right) \left( \frac{A_{iso}}{a_{iso}} \right) \times 10^{-3} \quad (S2)$ $C_Y = \left( \frac{Q_2 - b_2}{a_2} \right) \left( \frac{A_{iso}}{a_{iso}} \right) \times 10^{-3} \quad (S3)$ <p><math>C_X</math>, <math>C_Y</math> = concentrations of drug X and Y, respectively; <math>Q_1 = A_1/A_{iso}</math> for the first component (x); <math>Q_2 = A_2/A_{iso}</math> for the second component (Y). At the isoabsorptive point (<math>A_{iso}/C_X + C_Y</math>), <math>A_{iso}</math> represents the absorbance and <math>A_{iso}</math> the absorptivity. The regression equation's slope, <math>a_1</math>, compares <math>Q_1</math> to <math>C_X/C_X + C_Y</math>. The regression equation's slope, or <math>a_2</math>, is <math>Q_2</math> versus <math>C_Y/C_X + C_Y</math>. The intercept values of these regression equations are <math>b_1</math> and <math>b_2</math>. The mixture solution's absorbances at <math>\lambda_1</math> and <math>\lambda_2</math> are indicated by the letters <math>A_1</math> and <math>A_2</math>. The concentration was changed from mg/mL to µg/mL by the (<math>10^3</math>), for more details refer to reference [8]</p>                                                                       |
| 3)  | EXRS         | <p>The proposed binary mixture of (X, CIP) and (Y, HYD), X concentration (µg/mL) can be determined by dividing the spectrum of the mixture (X + Y) by a known concentration of Y (µg/mL) as a divisor (<math>Y'</math>). A new curve representing <math>\left( \frac{X}{Y'} \right) + \left( \frac{Y}{Y'} \right)</math> will result from this division, and show the plateau region where <math>\frac{Y}{Y'}</math> = constant may be measured. Then, a zero-order absorption spectrum <math>D_0</math> of X (the original spectrum of X) could be obtained by subtracting this constant value and multiplying the obtained curve by <math>Y'</math> (the divisor), as the following equations show, for more details refer to reference [8]:</p> $\frac{(X+Y)}{Y'} = \frac{X}{Y'} + \frac{Y}{Y'} = \frac{X}{Y'} + \text{constant.} \quad (S4)$ $\frac{X}{Y'} + \text{constant} - \text{constant} = \frac{X}{Y'}. \quad (S5)$ $\frac{X}{Y'} \times Y' = X \text{ as a zero-order absorption spectra, } D_0. \quad (S6)$ <p>Inversely, using <math>X'</math> as an advisor will extend the resulting equations to determine the second drug Y. Consequently, the regression equations that represent the linear relationship between the zero-order (<math>D_0</math>) absorbance at its <math>\lambda_{max}</math> and the corresponding varied concentrations of X and Y, respectively, could be used to evaluate the unknown concentrations of X and Y medications</p> |
| 4)  | RD           | <p>This method relies on the interfering component's independence, i.e., the concentration of the component of interest is directly proportional to the amplitude difference between two points on the ratio spectra of a mixture. As a result, by dividing the mixture's spectrum by a known concentration of Y as a divisor (<math>Y'</math>, µg/mL), the drug X (µg/mL) could be ascertained. The new curve that results from the division represents:</p> $\frac{(X+Y)}{Y'} = \frac{X}{Y'} + \frac{Y}{Y'} = \frac{X}{Y'} + \text{constant.} \quad (S7)$ <p>To eliminate the constant <math>\frac{Y}{Y'}</math>. Furthermore, for any other instrumental error or interference from the sample matrix, choose two wavelengths (<math>\lambda_1</math> and <math>\lambda_2</math>) on the obtained ratio spectrum and subtract the amplitudes at these two points.</p>                                                                                                                                                                                                                                                                                                                                                                                                                                                                                                                                                                                                  |

(Continued)

Table S2: Continued

| No. | The approach | The manipulation theory                                                                                                                                                                                                                                                                                                                                                                                                                                                                                                                                                                                                                                                                                                                                                                                                                                                                                                                                                                                                                                                                                                                                                                                                                                                                                                                                                                                                                                                                                                                                                                                                                                                         |
|-----|--------------|---------------------------------------------------------------------------------------------------------------------------------------------------------------------------------------------------------------------------------------------------------------------------------------------------------------------------------------------------------------------------------------------------------------------------------------------------------------------------------------------------------------------------------------------------------------------------------------------------------------------------------------------------------------------------------------------------------------------------------------------------------------------------------------------------------------------------------------------------------------------------------------------------------------------------------------------------------------------------------------------------------------------------------------------------------------------------------------------------------------------------------------------------------------------------------------------------------------------------------------------------------------------------------------------------------------------------------------------------------------------------------------------------------------------------------------------------------------------------------------------------------------------------------------------------------------------------------------------------------------------------------------------------------------------------------|
|     |              | <p>Assuming that the amplitudes at the two chosen wavelengths are <math>P1</math> and <math>P2</math> at <math>\lambda_1</math> and <math>\lambda_2</math>, respectively, the interfering substance <math>Y</math> exhibits no interference when the two amplitudes are subtracted</p> $P1 - P2 = \left[ \left( \frac{Y}{Y'} \right)_1 + \text{constant} \right] - \left[ \left( \frac{Y}{Y'} \right)_2 + \text{constant} \right] = \left( \frac{Y}{Y'} \right)_1 - \left( \frac{Y}{Y'} \right)_2. \quad (S8)$ <p>The regression equation, which shows the linear relationship between the variations in ratio spectra amplitudes at the two chosen wavelengths and the corresponding drug (<math>X</math>) concentration (<math>\mu\text{g/mL}</math>), is used to determine the concentration of <math>X</math>. Likewise, by applying the same process to a known concentration of <math>X</math> (<math>\mu\text{g/mL}</math>) as a divisor <math>X'</math>, <math>Y</math> could be ascertained, for more details refer to reference [8]</p>                                                                                                                                                                                                                                                                                                                                                                                                                                                                                                                                                                                                                               |
| 5)  | MCR          | <p>The ratio spectra are obtained in this manner, and the next step is to mean centre the ratio spectra to eliminate the constant. It can be written if there is no interaction between the compounds. Beer's law is followed for every compound in the combination of the drugs (<math>X</math>) and (<math>Y</math>).</p> $A_m = a_X C_X + C_Y \quad (S9)$ <p>Where <math>A_m</math> is the mixture's absorbance vector, <math>a_X</math> and <math>a_Y</math> are <math>X</math> and <math>Y</math>'s molar absorptivity vectors, and <math>C_X</math> and <math>C_Y</math> are <math>X</math> and <math>Y</math>'s respective concentrations.</p> <p>Assume that <math>A_m</math> is split by <math>a_Y</math>, representing the spectrum of a typical <math>Y</math> solution in a binary mixture. The first ratio spectrum is then obtained as follows in that scenario:</p> $B = \frac{A_m}{a_Y} = \frac{a_X C_X}{a_Y} + C_Y \quad (S10)$ <p>Given that <math>a</math> constant's (<math>C_Y</math>) mean-centering is zero, <math>B</math> is said to be mean-centered (MC)</p> $\text{MC}(B) = \text{MC} \left( \frac{A_m}{a_Y} \right) = \text{MC} \left( \frac{a_X C_X}{a_Y} \right) \quad (S11)$ <p>Without affecting (interfering) the other compound (<math>Y</math>), it can be seen that there is a linear relationship between the concentration of (<math>X</math>) in the solution and the amount of MC(B). Similarly, (<math>Y</math>) could be found by dividing <math>A_m</math> by <math>a_X</math>, which would be the spectrum of a typical solution of (<math>X</math>), and then continue as previously, for more details refer to reference [8]</p> |

**Table S3:** Chromatographic conditions and trails on HPLC-UV and TLC-spectrodensitometric methods

| No | The studied point              | The utilized approach                                                                                                                                                                                                                                                                                                                                                                                                                                                                                                     |                                                                                                                                                                                                                                                                                                                                                                                                                                                                                                                                                                                                                                                                                                                                         |
|----|--------------------------------|---------------------------------------------------------------------------------------------------------------------------------------------------------------------------------------------------------------------------------------------------------------------------------------------------------------------------------------------------------------------------------------------------------------------------------------------------------------------------------------------------------------------------|-----------------------------------------------------------------------------------------------------------------------------------------------------------------------------------------------------------------------------------------------------------------------------------------------------------------------------------------------------------------------------------------------------------------------------------------------------------------------------------------------------------------------------------------------------------------------------------------------------------------------------------------------------------------------------------------------------------------------------------------|
|    |                                | RP-HPLC-UV                                                                                                                                                                                                                                                                                                                                                                                                                                                                                                                | TLC-spectrodensitometric                                                                                                                                                                                                                                                                                                                                                                                                                                                                                                                                                                                                                                                                                                                |
| 1) | The selected wavelength, nm    | <ul style="list-style-type: none"> <li>The CIP and HYD together constituted a ratio of (2.3:10) in their commercial dosage forms. Both medications responded equally when the detection was made at 256 nm (Figure 2b, in the manuscript. For more details refer to reference [9])</li> </ul>                                                                                                                                                                                                                             | <ul style="list-style-type: none"> <li>Different scanning wavelengths, 243 and 256 nm, have been tried.</li> <li>Nevertheless, the separated peaks were more symmetrical, noise-free, and sharp at 243 nm. For more details refer to reference [9]</li> </ul>                                                                                                                                                                                                                                                                                                                                                                                                                                                                           |
| 2) | The separated stationary phase | <ul style="list-style-type: none"> <li>According to the initial tests, both medications had a higher resolution on a Zorbax SB-C<sub>18</sub> column</li> <li>However, the two medications could not be separated using a Zorbax SB-C<sub>8</sub> column</li> </ul>                                                                                                                                                                                                                                                       | <ul style="list-style-type: none"> <li>Only one stationary phase was tested: a TLC aluminium sheet (20 × 20 cm) that was precoated with silica gel 60 F254</li> </ul>                                                                                                                                                                                                                                                                                                                                                                                                                                                                                                                                                                   |
| 3) | Mobile phase                   | <ul style="list-style-type: none"> <li>Several bidistilled water-to-acetonitrile ratios were examined.</li> <li>The separation of CIP was marginally impacted by increasing the acetonitrile ratio</li> <li>However, it shortened the retention time of HYD, which impacted its elution and resulted in the overlap of HYD's peak with CIP's</li> <li>There was some broadening of the CIP peak with an increase in the water ratio</li> <li>The HYD peak tails when methanol is used in place of acetonitrile</li> </ul> | <ul style="list-style-type: none"> <li>The separation of CIP was somewhat impacted by increasing the ethyl acetate ratio. It did, however, also have an impact on HYD's migration to the solvent front. Hexane was added to stop HYD from migrating to the solvent front, but it also suppressed the migration of CIP</li> <li>It took triethylamine to lessen both peaks' tailing</li> <li>Nevertheless, HYD moved to the solvent front when the ratio (or any other polar solvent, like methanol, ethanol, etc.) was increased</li> <li>Ultimately, it was discovered that employing the developing system with ethyl acetate, hexane, and triethylamine (50: 25: 25 v/v/v) produced the best separation of CIP and HYDHYD</li> </ul> |
| 4) | pH-controlled mobile phase     | <ul style="list-style-type: none"> <li>The addition of the pH-controlled solution preserved the CIP's peak symmetry</li> <li>Acetonitrile: bidistilled water: pH-controlled solution (pH 3) in the ratio (55: 40: 5 v/v/v) was used as the mobile phase</li> </ul>                                                                                                                                                                                                                                                        | <ul style="list-style-type: none"> <li>Triethylamine was added to adjust the pH to alkaline</li> </ul>                                                                                                                                                                                                                                                                                                                                                                                                                                                                                                                                                                                                                                  |
| 5) | Retention time, minutes        | <ul style="list-style-type: none"> <li>Each sample was run for less than 6 minutes</li> <li>The selected retention times for CIP and HYD were 1.97 and 5.58, respectively, (Figure 2b, in the manuscript. For more details refer to reference [9])</li> </ul>                                                                                                                                                                                                                                                             | <ul style="list-style-type: none"> <li>As illustrated in (Figure 2c, in the manuscript. For more details refer to reference [9]., CIP and HYD were separated at <math>R_f 0.06 \pm 0.02</math> and <math>0.66 \pm 0.01</math>, respectively, due to the significant polarity difference between the two medications.</li> </ul>                                                                                                                                                                                                                                                                                                                                                                                                         |
| 6) | Flow rate                      | <ul style="list-style-type: none"> <li>Various flow rates (0.5–1.2 mL/min) and wavelengths (243 and 256 nm) were tested</li> <li>At 256 nm, good resolution and linearity were achieved with 0.6 mL/min</li> </ul>                                                                                                                                                                                                                                                                                                        | <ul style="list-style-type: none"> <li>The developing solvent system was ascended by capillary action.</li> <li>TLC plates were scanned for both drugs at 243 nm. The detection was performed with the Camage TLC scanner 3</li> </ul>                                                                                                                                                                                                                                                                                                                                                                                                                                                                                                  |



**Table S4:** KPIs-based standards were used in benchmarking for the degree whiteness of the developed analytical approaches using the RGB 12 Algorithm

| Algorithm | KPIs-based standards                                                                                                                                                                                                                                                                                                                                                                                                                                                          |
|-----------|-------------------------------------------------------------------------------------------------------------------------------------------------------------------------------------------------------------------------------------------------------------------------------------------------------------------------------------------------------------------------------------------------------------------------------------------------------------------------------|
| Red       | <p><i>R1 (Scope of application):</i> number of simultaneously determined analytes, linearity range, resistance to the presence of potential interferences, Applying of Analytical Quality by Design</p> <p><i>R2 (LOD &amp; LOQ):</i> limits of detection and quantification (LOD and LOQ)</p> <p><i>R3 (Precision):</i> expressed in repeatability and reproducibility of the results</p> <p><i>R4 (Accuracy):</i> expresses as minimal relative error of determinations</p> |
| Green     | <p><i>G1 (Toxicity of reagents):</i> number of GHS Hazardous pictogram</p> <p><i>G2 (reagents and waste):</i> expressed as reagent consumption and waste production</p> <p><i>G3 (Energy):</i> lowest possible consumption of electricity</p> <p><i>G4 (Direct impact):</i> safety of operator, use of animals or GMOs</p>                                                                                                                                                    |
| Blue      | <p><i>B1 (Cost Efficiency):</i> related to personnel training level</p> <p><i>B2 (Time-efficiency):</i> total time of analysis</p> <p><i>B3 (Requirements):</i> includes sample consumption, advanced equipment, personnel qualifications, and laboratory infrastructure.</p> <p><i>B4 (Operational simplicity):</i> includes portability, integrated automation and miniaturization</p>                                                                                      |

**Table S5:** KPIs-based standards were used in benchmarking the greenness of the developed analytical methods

| Utilized tool | KPIs-based standards                                                                                                                                                                                                                                                                                                                                                                                                                                                                                                                       |  |  |
|---------------|--------------------------------------------------------------------------------------------------------------------------------------------------------------------------------------------------------------------------------------------------------------------------------------------------------------------------------------------------------------------------------------------------------------------------------------------------------------------------------------------------------------------------------------------|--|--|
| AES           | (1) sample preparation, (2) reagent and compound used, (3) sample collection, (4) preservation, transport, and storage, (5) instrumentation, and finally (6) method type                                                                                                                                                                                                                                                                                                                                                                   |  |  |
| AGREE         | (1) sample treatment, (2) sample amount, (3) device positioning, (4) sample preparation, (5) automated and miniaturized methods, (6) derivatization, (7) generation of a volume of waste, (8) analysis throughput, (9) use of energy, (10) renewable source of reagent, (11) toxicity of reagents, and finally (12) safety of the operator                                                                                                                                                                                                 |  |  |
| GAPI          | <p><b>Sample preparation and analysis</b></p> <p><b>I. Samples preparation</b></p> <p>(1) their collection, (2) preservation, (3) transport, (4) storage, (5) type of method, (6) scale of extraction, (7) solvents/reagents used, and finally (8) additional treatment</p> <p><b>II. Reagents and solvents</b></p> <p>(1) their amount, (2) health hazards, and finally, (3) safety hazards</p> <p><b>III. Instrumentation</b></p> <p>(1) their consumed energy, (2) occupational hazard, (3) waste, and finally, (4) waste treatment</p> |  |  |

**Table S6:** KPIs-based standards were used in benchmarking the blue-ness of the developed analytical approaches

| Utilized tool | KPIs-based standards                                                                                                                                                                                                                                                                        |
|---------------|---------------------------------------------------------------------------------------------------------------------------------------------------------------------------------------------------------------------------------------------------------------------------------------------|
| BAGI          | (1) Type of analyte<br>(2) Single or multiple-element analysis<br>(3) Analytical approach<br>(4) Simultaneous sample preparation<br>(5) Sample preparation<br>(6) Samples pre-hour<br>(7) Reagent and materials<br>(8) Preconcentration,<br>(9) Automation degree<br>(10) Amount of sample. |

**Table S7:** Computational spectrum manipulation techniques to resolve the overlapping zero-order absorption spectra ( $D_0$ ) of HYD and CIP

| No | The manipulated approach | Manipulation steps                                                                                                                                                                                                                                                                                                                                                                                                                                                                                                                                                                                                                                                                                                                                                                                                                                                                                                                                                                                                                                                                                                                                                                                                                                                                                                                                                                                                                                                                                                                                                                                                                                                                                                                                                                                                                                                                                                                                                                                      |
|----|--------------------------|---------------------------------------------------------------------------------------------------------------------------------------------------------------------------------------------------------------------------------------------------------------------------------------------------------------------------------------------------------------------------------------------------------------------------------------------------------------------------------------------------------------------------------------------------------------------------------------------------------------------------------------------------------------------------------------------------------------------------------------------------------------------------------------------------------------------------------------------------------------------------------------------------------------------------------------------------------------------------------------------------------------------------------------------------------------------------------------------------------------------------------------------------------------------------------------------------------------------------------------------------------------------------------------------------------------------------------------------------------------------------------------------------------------------------------------------------------------------------------------------------------------------------------------------------------------------------------------------------------------------------------------------------------------------------------------------------------------------------------------------------------------------------------------------------------------------------------------------------------------------------------------------------------------------------------------------------------------------------------------------------------|
| 1) | Iso                      | <ul style="list-style-type: none"> <li>– The total concentration (<math>\mu\text{g/mL}</math>) of CIP plus HYD has been determined using the regression equation that illustrates the linear relationship between the <math>D_0</math> absorbance of HYD at 256.2 nm and the Iso point (<math>\lambda_{\text{iso}} = 256.2 \text{ nm}</math>), as shown in Figure S7</li> <li>– Moreover, the linear relationship between the <math>D_2</math> absorbance of CIP at 256.8 nm and the regression equation could be used to determine the concentration of CIP in the mixture without any interference. Consequently, HYD concentration was determined by subtracting</li> </ul>                                                                                                                                                                                                                                                                                                                                                                                                                                                                                                                                                                                                                                                                                                                                                                                                                                                                                                                                                                                                                                                                                                                                                                                                                                                                                                                          |
| 2) | AR                       | <ul style="list-style-type: none"> <li>– Utilizing the obtained linear relationship between the AR value of the binary mixture of CIP (<math>X</math>) and HYD (<math>Y</math>) and the relative concentration (<math>\mu\text{g/mL}</math>) in that mixture, the AR method was utilized to ascertain the concentration of CIP (<math>C_x</math>) and HYD (<math>C_y</math>) in a binary mixture (<math>\mu\text{g/mL}</math>)</li> <li>– The choice of ideal wavelengths and the presence of an isoabsorptive point are the two primary requirements for using the AR method</li> <li>– To achieve a high degree of separation, the technique should be used with wavelengths (<math>\lambda_1, \lambda_2, \lambda_{\text{iso}}</math>) that allow for accurate component determination in the binary mixture</li> <li>– For identifying synthetic mixture concentrations of CIP and HYD, selecting two wavelengths (330 and 243 nm) adjacent to the isoabsorptive point (256.2 nm) produced the best recovery percentages.</li> <li>– Plotting the absorbance of the previously synthetic mixture at <math>\lambda_{\text{iso}}</math> (256.2 nm) against the total concentrations of (<math>C_x</math>) and (<math>C_y</math>) was done.</li> <li>– The slope of the regression line (<math>A_{\text{iso}}</math> is 0.030) was calculated using the regression equation. At 330 nm, 243 nm, and 256.2 nm, the absorbance of each solution was measured.</li> <li>– The relative absorbance (<math>Q_1</math> is <math>A_1/A_{\text{iso}}</math>) was then plotted against the relative concentration (<math>C_x/(C_x + C_y)</math>). The parameters of the regression equation (<math>b_1/a_1</math> is 0.071) were calculated.</li> <li>– Plotting the relative absorbance (<math>Q_2 = A_2/A_{\text{iso}}</math>) against the relative concentration (<math>C_y/(C_x + C_y)</math>) allowed for the computation of the regression equation parameters (<math>b_2/a_2</math> is 0.649).</li> </ul> |
| 3) | EXRS                     | <ul style="list-style-type: none"> <li>– The EXRS method initially started as an extension of the well-known spectrum manipulation of the RS method</li> <li>– The mixture's spectrum has been divided using a specific concentration (<math>\mu\text{g/mL}</math>) of one component as a divisor (a constant value will be the result). Therefore, the other has to be determined quantitatively</li> <li>– The absorbance of the constant value is then calculated along the plateau region parallel to the baseline at <math>\pm 2 \text{ nm}</math> (corresponding to the divisor's maximum peak in its zero order), subtracted from the ratio spectra, and finally multiplied by the divisor</li> <li>– To minimize noise error, each component of interest is recovered in its zero-order spectra and measured at its <math>\lambda_{\text{max}}</math> in the RS and EXRS methods. By dividing the binary mixture's spectrum by a known concentration of CIP as a divisor (6.0 <math>\mu\text{g/mL}</math> of CIP), the concentration of HYD could be assessed</li> <li>– The division's constant was measured at the plateau (330–350 nm). We can recover the zero-order absorption spectrum of HYD present in the mixture, Figure S8, by subtracting this constant value and multiplying the obtained curve by the spectrum of 6.0 <math>\mu\text{g/mL}</math> of CIP (the divisor). The measurement was made at its <math>\lambda_{\text{max}}</math> (243 nm).</li> <li>– Next, to calculate the concentration of CIP in the mixture, the constant value at (225–255 nm) was obtained by dividing the obtained <math>D_0</math> spectrum of a known concentration of HYD as a divisor (5 <math>\mu\text{g/mL}</math>).</li> <li>– The previously obtained constant can be obtained by dividing the binary mixture's spectrum by the divisor, or 5.0 <math>\mu\text{g/mL}</math> of HYD.</li> </ul>                                                                                           |

(Continued)

Table S7: Continued

| No | The manipulated approach | Manipulation steps                                                                                                                                                                                                                                                                                                                                                                                                                                                                                                                                                                                                                                                                                                                                                                                                                                                                                                                                                                                                                                                                                                                                                                                                                                                                                                                                                                                                                                                                                                                                                                                                                                                                                                                                                                                                                                                                                                                                                                                                  |
|----|--------------------------|---------------------------------------------------------------------------------------------------------------------------------------------------------------------------------------------------------------------------------------------------------------------------------------------------------------------------------------------------------------------------------------------------------------------------------------------------------------------------------------------------------------------------------------------------------------------------------------------------------------------------------------------------------------------------------------------------------------------------------------------------------------------------------------------------------------------------------------------------------------------------------------------------------------------------------------------------------------------------------------------------------------------------------------------------------------------------------------------------------------------------------------------------------------------------------------------------------------------------------------------------------------------------------------------------------------------------------------------------------------------------------------------------------------------------------------------------------------------------------------------------------------------------------------------------------------------------------------------------------------------------------------------------------------------------------------------------------------------------------------------------------------------------------------------------------------------------------------------------------------------------------------------------------------------------------------------------------------------------------------------------------------------|
|    |                          | <ul style="list-style-type: none"> <li>– After subtracting this constant, we can obtain the zero-order absorption spectrum of CIP present in the mixture (Figure 9 and measure it at its <math>\lambda_{\max}</math> (278.6 nm) by multiplying the obtained curve by the spectrum of 5.0 <math>\mu\text{g/mL}</math> of HYD.</li> <li>– Furthermore, the linear relationship between each compound's zero order (<math>D_0</math>) absorbance at 278.6 and 243 nm and the corresponding concentrations of CIP and HYD was determined using regression equations to determine the concentration of CIP and HYD, respectively</li> <li>– Various concentrations of HYD (3.0, 5.0 and 7.0 <math>\mu\text{g/mL}</math>) and CIP (3.0, 6.0 and 9.0 <math>\mu\text{g/mL}</math>) were tested as a divisor; however, the concentrations of HYD (5.0 <math>\mu\text{g/mL}</math>) and CIP (6.0 <math>\mu\text{g/mL}</math>) produced the smoothest RS, the least amount of noise, and the highest sensitivity</li> </ul>                                                                                                                                                                                                                                                                                                                                                                                                                                                                                                                                                                                                                                                                                                                                                                                                                                                                                                                                                                                                    |
| 4) | RD                       | <ul style="list-style-type: none"> <li>– The RD method uses the ratio spectrum to measure the difference between two amplitude values at two wavelengths in a single step, reducing the need for derivative steps and improving signal-to-noise ratio</li> <li>– To guarantee a low noise-to-signal ratio at these wavelengths, the linearity of the amplitude values at each selected wavelength against the corresponding concentration should be examined</li> <li>– To eliminate noise, the two values at two chosen wavelengths are subtracted when using the RD method to measure the difference between the amplitude values</li> <li>– The contribution of the CIP and HYD at the two chosen wavelengths (279.8 and 241.7 nm, in this case) was the only requirement for determining the CIP concentration using this method</li> <li>– The HYD's ratio spectrum displayed the same amplitudes (constant). However, the CIP showed a significant difference in these two amplitude values with concentration at these two chosen wavelengths. Likewise, two additional wavelengths (241.7 and 221.5 nm) were chosen to estimate the HYD</li> <li>– The spectra of HYD (5.0 <math>\mu\text{g/mL}</math>) and CIP (6.0 <math>\mu\text{g/mL}</math>) divided the spectra of CIP solutions (2.0–14.0 <math>\mu\text{g/mL}</math>) and HYD solutions (1.0–14.0 <math>\mu\text{g/mL}</math>), respectively, as shown in Figure S10.</li> <li>– The linear relationship between the differences of these ratio spectra amplitudes at the two chosen wavelengths and the corresponding concentration of drug CIP was represented by the regression equation, which was used to calculate the concentration of CIP. Likewise, HYD might be ascertained in the same way. The concentrations of the divisors were chosen as per the EXRS method.</li> <li>– When used to predict CIP and HYD concentrations in bulk powder and mixture, the chosen wavelengths yielded the best average recovery percentage</li> </ul> |
| 5) | MCR                      | <ul style="list-style-type: none"> <li>– By doing away with derivative steps, this approach improves the signal-to-noise ratio.</li> <li>– The ratio spectra for both drugs from the RD method were mean-centred in the 200–330 nm range, as shown in Figure S11. The spectra from 330–400 nm were excluded because they impacted the MC curves' linearity</li> <li>– The regression equation, which shows the linear relationship between (MC) at 279.8 nm for CIP and 241.7 nm for HYD, was used to determine the concentration of both medications (<math>\mu\text{g/mL}</math>)</li> </ul>                                                                                                                                                                                                                                                                                                                                                                                                                                                                                                                                                                                                                                                                                                                                                                                                                                                                                                                                                                                                                                                                                                                                                                                                                                                                                                                                                                                                                      |

**Table S8:** Statistical analysis of parameters required for system suitability of HPLC-UV and TLC-spectrodensitometric methods

| Parameter                                        | HPLC-UV method |       | TLC-spectrodensitometric method |                 | Reference value [10]                                     |
|--------------------------------------------------|----------------|-------|---------------------------------|-----------------|----------------------------------------------------------|
|                                                  | CIP            | HYD   | CIP                             | HYD             |                                                          |
| $t_R$ (HPLC-UV)/ $R_f$ (TLC-spectrodensitometry) | 1.97           | 5.58  | $0.06 \pm 0.01$                 | $0.66 \pm 0.01$ | $t_R > 1$ (HPLC-UV)                                      |
| $N$ (Column efficiency)                          | 7096           | 13960 |                                 |                 | $N > 2000$ Increases the efficiency of the separation.   |
| HETP (Height equivalent to theoretical plates)   | 0.002          | 0.001 |                                 |                 | The smaller the value, the higher the column efficiency. |
| $T$ (tailing factor)                             | 1.03           | 0.89  | 1.13                            | 1.01            | $T < 2$ . $T = 1$ for symmetric peak                     |
| $R_s$ (Experimental Resolution)                  | 8.30           |       | 10.48                           |                 | $R_s > 2$ .                                              |

**Table S9:** Assay parameters and method validation were obtained by applying UV-spectrophotometric manipulated methods

| Parameters                                                 | Iso method              |                         | AR method             |                         | EXRS method           |                                 | RDS method                     |                      | MCR method           |  |
|------------------------------------------------------------|-------------------------|-------------------------|-----------------------|-------------------------|-----------------------|---------------------------------|--------------------------------|----------------------|----------------------|--|
|                                                            | CIP $D^2$<br>(256.8 nm) | HYD $D_0$<br>(256.2 nm) | CIP $D_0$<br>(330 nm) | CIP $D_0$<br>(278.6 nm) | HYD $D_0$<br>(243 nm) | CIP $P1 - P2$<br>(279.8 -241.7) | HYD $P1 - P2$<br>(241.7-221.5) | CIP MC<br>(279.8 nm) | HYD MC<br>(241.7 nm) |  |
| Calibration range ( $n = 5$ )                              | 2.0-14.0                | 1.0-14.0                | 2.0-14.0              | 2.0-14.0                | 2.0-14.0              | 2.0-14.0                        | 2.0-14.0                       | 2.0-14.0             | 1.0-14.0             |  |
| LOD, $\mu\text{g/mL}$                                      | 0.19                    | 0.16                    | 0.13                  | 0.14                    | 0.08                  | 0.18                            | 0.12                           | 0.13                 | 0.05                 |  |
| LOQ, $\mu\text{g/mL}$                                      | 0.58                    | 0.50                    | 0.40                  | 0.41                    | 0.26                  | 0.56                            | 0.37                           | 0.40                 | 0.16                 |  |
| Slope                                                      | 0.0327                  | 0.0301                  | 0.0305                | 0.1044                  | 0.0512                | 6.3589                          | 0.2654                         | 3.8564               | 0.3208               |  |
| Intercept                                                  | -0.0039                 | 0.0010                  | 0.0032                | 0.0042                  | -0.0009               | 0.6035                          | -0.0041                        | 0.2318               | -0.0087              |  |
| Mean % ( $n = 3$ )                                         | 100.18                  | 99.93                   | 99.99                 | 100.20                  | 100.16                | 100.04                          | 99.89                          | 100.07               | 99.93                |  |
| RSD ( $n = 3$ )                                            | 0.83                    | 0.59                    | 0.69                  | 0.87                    | 1.01                  | 0.82                            | 0.60                           | 0.75                 | 0.46                 |  |
| Accuracy (Mean recovery % $\pm$ RSD, $n = 3$ ).            | 99.96 $\pm$ 1.65        | 99.58 $\pm$ 0.58        | 100.21 $\pm$ 1.34     | 100.57 $\pm$ 0.87       | 99.92 $\pm$ 0.47      | 100.22 $\pm$ 1.17               | 99.52 $\pm$ 0.32               | 100.03 $\pm$ 1.13    | 100.16 $\pm$ 0.48    |  |
| Intra-day precision (Mean recovery % $\pm$ RSD, $n = 3$ )  | 0.60                    | 0.43                    | 0.97                  | 0.61                    | 0.16                  | 0.42                            | 0.27                           | 0.47                 | 0.57                 |  |
| Inter-day precision (Mean recovery % $\pm$ RSD, $n = 3$ ). | 0.48                    | 0.84                    | 1.02                  | 0.83                    | 0.44                  | 0.54                            | 0.49                           | 0.66                 | 0.84                 |  |
| Robustness (Mean recovery % $\pm$ RSD, $n = 3$ )           | 0.91                    | 1.01                    | 0.93                  | 0.76                    | 0.64                  | 0.91                            | 0.55                           | 0.73                 | 0.84                 |  |
| Correlation coefficient ( $r$ )                            | 0.9999                  | 0.9999                  | 0.9999                | 1.00                    | 1.00                  | 0.9999                          | 0.9999                         | 0.9999               | 1.00                 |  |

$D^2$  is the second derivative amplitude; MC is the mean centring amplitude;  $P1-P2$  is the difference in amplitude; and  $D_0$  is the zero-order absorbance.

**Table S10:** Assay parameters and method validation were obtained by applying the RP-HPLC-UV and TLC-spectrodensitometric methods

| Parameters                                                 | RP-HPLC-UV method |                  | TLC-spectrodensitometric method |                   |
|------------------------------------------------------------|-------------------|------------------|---------------------------------|-------------------|
|                                                            | CIP               | HYD              | CIP                             | HYD               |
| Calibration range <sup>a</sup> ( $n = 5$ )                 | 1.0–8.0           | 1.0–8.0          | 0.2–1.6                         | 0.6–2.0           |
| LOD, $\mu\text{g}/\text{mL}$                               | 0.12              | 0.08             | 0.03                            | 0.05              |
| LOQ, $\mu\text{g}/\text{mL}$                               | 0.37              | 0.24             | 0.09                            | 0.14              |
| Slope                                                      | 0.8741            | 0.9405           | 2.969                           | 3.593             |
| Intercept                                                  | 0.1235            | 0.0304           | 2.208                           | 0.2453            |
| Mean %, ( $n = 3$ )                                        | 99.89             | 100.28           | 99.74                           | 99.94             |
| RSD ( $n = 3$ )                                            | 0.61              | 1.27             | 1.27                            | 1.54              |
| Accuracy (Mean recovery % $\pm$ RSD, $n = 3$ ).            | 100.32 $\pm$ 0.78 | 99.89 $\pm$ 0.34 | 100.50 $\pm$ 1.00               | 100.21 $\pm$ 0.59 |
| Intra-day precision (Mean recovery % $\pm$ RSD, $n = 3$ )  | 100.37 $\pm$ 0.19 | 99.86 $\pm$ 0.46 | 100.29 $\pm$ 0.65               | 99.78 $\pm$ 0.76  |
| Inter-day precision (Mean recovery % $\pm$ RSD, $n = 3$ ). | 99.89 $\pm$ 0.40  | 99.83 $\pm$ 0.45 | 100.20 $\pm$ 1.01               | 99.29 $\pm$ 1.15  |
| Robustness (Mean recovery % $\pm$ RSD, $n = 3$ ).          | 100.32 $\pm$ 0.42 | 99.95 $\pm$ 0.61 | 100.94 $\pm$ 1.28               | 100.43 $\pm$ 1.73 |
| Correlation coefficient ( $r$ ).                           | 0.9999            | 0.9999           | 0.9998                          | 0.9997            |

<sup>a</sup> RP-HPLC-UV methods: in ( $\mu\text{g}/\text{mL}$ ); TLC-spectrodensitometric methods: in ( $\mu\text{g}/\text{band}$ ).

**Table S11:** Determination of CIP and HYD in laboratory-prepared mixtures by the UV-spectrophotometric manipulated methods

| Ratios                  | Iso method |            | AR method  |            | EXRS method |            | RDS method |            | MCR method |            |
|-------------------------|------------|------------|------------|------------|-------------|------------|------------|------------|------------|------------|
|                         | CIP        | HYD        | CIP        | HYD        | CIP         | HYD        | CIP        | HYD        | CIP        | HYD        |
| Recovery % <sup>a</sup> |            |            |            |            |             |            |            |            |            |            |
| 5:5                     | 98.40      | 101.60     | 98.65      | 98.88      | 99.65       | 99.96      | 99.01      | 99.56      | 99.00      | 101.40     |
| 2:4                     | 102.50     | 101.75     | 102.31     | 101.05     | 102.44      | 101.51     | 99.88      | 99.86      | 100.00     | 101.25     |
| 2:6                     | 101.00     | 102.00     | 99.30      | 98.47      | 101.49      | 99.90      | 99.20      | 101.43     | 99.50      | 101.17     |
| 2:1                     | 99.00      | 101.70     | 100.35     | 99.64      | 101.49      | 100.37     | 101.41     | 100.72     | 101.50     | 101.19     |
| 8:4                     | 102.00     | 100.75     | 100.39     | 100.42     | 100.99      | 101.51     | 100.71     | 98.62      | 100.63     | 101.75     |
| 4:6                     | 101.50     | 99.50      | 100.16     | 99.46      | 101.32      | 100.88     | 100.20     | 99.48      | 100.25     | 102.00     |
| 9:3                     | 100.89     | 99.33      | 100.19     | 102.18     | 100.75      | 101.50     | 100.60     | 99.59      | 100.56     | 101.67     |
| 6:4                     | 101.33     | 102.75     | 102.25     | 101.77     | 101.74      | 102.00     | 102.25     | 98.82      | 102.00     | 101.25     |
| Mean $\pm$ SD           | 100.83     | 101.17     | 100.45     | 100.23     | 101.23      | 100.95     | 100.41     | 99.76      | 100.43     | 101.55     |
| ( $n = 3$ )             | $\pm 1.42$ | $\pm 1.21$ | $\pm 1.28$ | $\pm 1.35$ | $\pm 0.82$  | $\pm 0.80$ | $\pm 1.09$ | $\pm 0.93$ | $\pm 0.99$ | $\pm 0.32$ |

**Table S12:** Determination of CIP and HYD in laboratory-prepared mixtures by the HPLC-UV and TLC-spectrodensitometric methods

| Mixture No. | Ratio | HPLC-UV method   |                               |           |                  | TLC-spectrodensitometric method |           |                  |                               |               |      |        |  |               |
|-------------|-------|------------------|-------------------------------|-----------|------------------|---------------------------------|-----------|------------------|-------------------------------|---------------|------|--------|--|---------------|
|             |       | CIP              |                               | HYD       |                  | CIP                             |           | HYD              |                               |               |      |        |  |               |
|             |       | Taken<br>(µg/mL) | Found <sup>a</sup><br>(µg/mL) | Recovery% | Taken<br>(µg/mL) | Found <sup>a</sup><br>(µg/mL)   | Recovery% | Taken<br>(µg/mL) | Found <sup>a</sup><br>(µg/mL) | Recovery%     |      |        |  |               |
| 1           | 1:1   | 2                | 2.01                          | 100.54    | 2                | 1.99                            | 99.54     | 0.80             | 0.80                          | 100.32        | 0.80 | 99.77  |  |               |
| 2           | 1:2   | 2                | 1.99                          | 99.69     | 4                | 4.03                            | 100.69    | 0.40             | 0.40                          | 100.98        | 0.80 | 99.65  |  |               |
| 3           | 1:3   | 1                | 1.01                          | 100.80    | 3                | 2.99                            | 99.66     | 0.20             | 0.20                          | 101.43        | 1.60 | 100.63 |  |               |
| 4           | 1:5   | 1                | 1.01                          | 101.18    | 5                | 5.00                            | 100.01    | 0.20             | 0.20                          | 100.32        | 1.00 | 100.93 |  |               |
| 5           | 2:1   | 4                | 4.04                          | 100.93    | 2                | 2.01                            | 100.59    | 1.2              | 1.20                          | 99.76         | 0.60 | 101.32 |  |               |
| 6           | 2:3   | 2                | 1.99                          | 99.64     | 3                | 2.99                            | 99.90     | 0.60             | 0.60                          | 99.65         | 0.90 | 100.02 |  |               |
| 7           | 3:2   | 3                | 2.99                          | 99.79     | 1                | 1.00                            | 99.72     | 0.90             | 0.91                          | 100.82        | 0.60 | 99.84  |  |               |
| Mean ± SD   |       | 100.38 ± 0.60    |                               |           |                  | 100.11 ± 0.50                   |           |                  |                               | 100.47 ± 0.65 |      |        |  | 100.31 ± 0.61 |

<sup>a</sup> $\eta = 3$ .



**Table S13:** Application of standard addition technique to the analysis of CIP and HYD in the commercial ear drops by UV-spectrophotometric manipulated methods benchmarked to the manufacturer method [11]

| Methods                 | CIP                            |                                                                           | HYD                            |                                                                           |
|-------------------------|--------------------------------|---------------------------------------------------------------------------|--------------------------------|---------------------------------------------------------------------------|
|                         | Found% $\pm$ SD<br>( $n = 6$ ) | Pure added (2.0, 4.0, 6.0 $\mu$ g) mean<br>recovery% $\pm$ SD ( $n = 3$ ) | Found% $\pm$ SD<br>( $n = 6$ ) | Pure added (1.0, 2.0, 3.0 $\mu$ g) mean<br>recovery% $\pm$ SD ( $n = 3$ ) |
| Iso                     | 101.23 $\pm$ 0.58              | 100.60 $\pm$ 0.18                                                         | 98.07 $\pm$ 0.46               | 100.34 $\pm$ 0.12                                                         |
| AR                      | 101.24 $\pm$ 0.81              | 100.56 $\pm$ 0.62                                                         | 98.03 $\pm$ 0.74               | 100.43 $\pm$ 0.55                                                         |
| EXRS                    | 101.28 $\pm$ 0.62              | 100.43 $\pm$ 0.42                                                         | 98.35 $\pm$ 0.66               | 99.87 $\pm$ 0.74                                                          |
| RDS                     | 101.33 $\pm$ 0.94              | 100.52 $\pm$ 0.19                                                         | 98.75 $\pm$ 0.73               | 100.19 $\pm$ 0.27                                                         |
| MCR                     | 100.90 $\pm$ 0.93              | 100.16 $\pm$ 0.23                                                         | 98.11 $\pm$ 0.78               | 100.49 $\pm$ 0.36                                                         |
| Manufacturer HPLC (11)* | 101.66 $\pm$ 0.81              |                                                                           | 98.01 $\pm$ 0.64               |                                                                           |

\*Manufacturer method [11] is HPLC-UV (the conditions: RP<sub>C18</sub> column, mobile phase (buffered bidistilled H<sub>2</sub>O: MeOH, 55:45%, v/v), the flow rate = 1.5 mL/min, and the detection at 240 nm).

**Table S14:** Application of standard addition technique to the analysis of CIP and HYD in the commercial ear drops by the RP-HPLC-UV and TLC-spectrodensitometric methods benchmarked to the manufacturer method [11]

| Commercial ear drops | RP-HPLC-UV method |               |                        |                    | TLC-spectrodensitometric method |                   |                 |                        | Manufacturer method [11] <sup>c</sup> |                        |
|----------------------|-------------------|---------------|------------------------|--------------------|---------------------------------|-------------------|-----------------|------------------------|---------------------------------------|------------------------|
|                      | Claimed (µg/mL)   | Found (µg/mL) | Recovery% <sup>a</sup> | Pure added (µg/mL) | Recovery% <sup>b</sup>          | Claimed (µg/band) | Found (µg/band) | Recovery% <sup>a</sup> | Pure added (µg/band)                  | Recovery% <sup>b</sup> |
|                      |                   |               |                        |                    |                                 |                   |                 |                        |                                       |                        |
| CIP                  | 1.15              | 1.16          | 101.20 ± 0.48          | 2.0                | 2.01                            | 0.23              | 0.23            | 101.48 ± 0.51          | 0.5                                   | 100.96                 |
|                      |                   |               |                        | 3.0                | 3.04                            |                   |                 |                        | 0.75                                  | 100.43                 |
|                      |                   |               |                        | 4.0                | 4.01                            |                   |                 |                        | 0.85                                  | 100.13                 |
|                      |                   |               |                        | 5.0                | 4.98                            |                   |                 |                        | 1.0                                   | 99.99                  |
|                      |                   | Mean ± SD     |                        |                    | 100.40 ± 0.73                   |                   |                 |                        |                                       | 100.15 ± 0.41          |
| HYD                  | 5.0               | 4.91          | 98.14 ± 0.36           | 1.0                | 1.00                            | 1.0               | 0.982           | 98.25 ± 0.34           | 0.2                                   | 0.20                   |
|                      |                   |               |                        | 1.5                | 1.50                            |                   |                 |                        | 0.4                                   | 0.40                   |
|                      |                   |               |                        | 2.0                | 2.00                            |                   |                 |                        | 0.6                                   | 0.60                   |
|                      |                   |               |                        | 2.5                | 2.53                            |                   |                 |                        | 0.8                                   | 0.80                   |
|                      |                   | Mean ± SD     |                        |                    | 100.27 ± 0.55                   |                   |                 |                        |                                       | 100.25 ± 0.41          |

<sup>a</sup>*n* = 6. <sup>b</sup>*n* = 3. <sup>c</sup>Manufacturer method [11] is RP-HPLC-UV (the conditions: RP<sub>-C18</sub> column, mobile phase (buffered bidistilled H<sub>2</sub>O: MeOH, 55:45%, v/v), the flow rate = 1.5 mL/min, and the detection at 240 nm).

**Table S15:** Statistical comparison between the results obtained by the UV-spectrophotometric manipulated methods and official BP methods (12) for the determination of CIP and HYD in pure powder form

| Items                           | CIP determination methods |       |        |        |        |                 | HYD determination methods |        |       |           |                 |
|---------------------------------|---------------------------|-------|--------|--------|--------|-----------------|---------------------------|--------|-------|-----------|-----------------|
|                                 | Iso                       | AR    | EXRS   | MCR    | RDS    | Official method | Iso                       | EXRS   | RDS   | MCR       | Official method |
| Mean recovery% ( $n = 5$ )      | 99.91                     | 99.86 | 100.20 | 100.07 | 100.04 | 100.82          | 99.93                     | 100.16 | 99.89 | 99.93     | 99.46           |
| RSD                             | 1.14                      | 0.30  | 0.76   | 0.58   | 0.67   | 0.19            | 0.21                      | 1.17   | 0.36  | 0.17      | 0.26            |
| Standard error of the mean, SEM | 0.29                      | 0.33  | 0.25   | 0.38   | 0.38   | 0.33            | 0.19                      | 0.27   | 0.21  | 0.32      | 0.26            |
| No. of experiments              | 5                         | 5     | 5      | 5      | 5      | 5               | 5                         | 5      | 5     | 5         | 5               |
| Student's $t$ -test (2.201)**   | 1.539                     | 2.192 | 1.471  | 1.991  | 1.922  |                 | 1.479                     | 1.417  | 1.317 | 1.768     |                 |
| $F$ value (6.094)**             | 3.583                     | 1.566 | 3.909  | 2.943  | 3.497  |                 | 1.331                     | 3.949  | 1.408 | 1.212     |                 |
|                                 |                           |       |        |        |        |                 | (4.120)**                 |        |       | (4.120)** |                 |

\*\*Figures between parentheses represent the corresponding tabulated values of the  $t$ -test and  $F$ -test at  $p = 0.05$ .

**Table S16:** SM. Statistical comparison between the results obtained by the RP-HPLC-UV and TLC-spectrodensitometric methods and official BP methods [12] for the determination of CIP and HYD in pure powder form

| Parameters                  | RP-HPLC-UV methods |        | TLC-spectrodensitometric methods |       | Official method |        |
|-----------------------------|--------------------|--------|----------------------------------|-------|-----------------|--------|
|                             | CIP                | HYD    | CIP                              | HYD   | CIP             | HYD    |
| Mean recovery% ( $n = 5$ )  | 99.89              | 100.28 | 99.74                            | 99.94 | 99.86           | 100.52 |
| RSD                         | 0.61               | 1.27   | 1.27                             | 1.54  | 0.85            | 0.64   |
| No. of experiments          | 5                  | 5      | 5                                | 5     | 5               | 5      |
| Student's $t$ -test (1.81)* | 1.09               | 0.87   | 1.32                             | 1.01  |                 |        |
| $F$ test (4.53)*            | 2.03               | 2.44   | 1.15                             | 3.17  |                 |        |

\*Figures between parentheses represent the corresponding tabulated values of the  $t$ -test and  $F$ -test at  $p = 0.05$ .

## References

- [1] Erram SV, Tipnis HP. Simple spectrometric analysis of propranolol hydrochloride and hydrochlorothiazide from combined pharmaceutical dosages. *Indian Drugs J.* 1994;31:65–8.
- [2] El-Ghobashy MR, Abo-Talib NF. Spectrophotometric methods for the simultaneous determination of binary mixture of metronidazole and diloxanide furoate without prior separation. *J Adv Res.* 2010;1(4):323–9.
- [3] Erk N. Simultaneous determination of fosinopril and hydrochlorothiazide in pharmaceutical formulations by spectrophotometric methods. *J Pharm Biomed Anal.* 2002;27(6):901–12.
- [4] Lotfy HM, Abdel-Monem Hagazy M. Comparative study of novel spectrophotometric methods manipulating ratio spectra: An application on pharmaceutical ternary mixture of omeprazole, tinidazole and clarithromycin. *Spectrochim Acta Part A: Mol Biomole Spectrosc.* 2012;96:259–70.
- [5] Lotfy HM, Hegazy MAM, Abdel-Gawad SAN. Simultaneous determination of Simvastatin and Sitagliptin in tablets by new univariate spectrophotometric and multivariate factor based methods. *Eur J Chem.* 2013;4(4):414–21.
- [6] El-Bardicy MG, Lotfy HM, El-Sayed MA, El-Tarras MF. Smart stability-indicating spectrophotometric methods for determination of binary mixtures without prior separation. *J AOAC Int.* 2008;91(2):299–310.
- [7] Afkhami A, Bahram M. Mean centering of ratio kinetic profiles as a novel spectrophotometric method for the simultaneous kinetic analysis of binary mixtures. *Analyt Chim Acta.* 2004;526(2):211–8.
- [8] Lotfy HM, Hassan NY, Elgizawy SM, Saleh SS. Comparative study of new spectrophotometric methods; An application on pharmaceutical binary mixture of ciprofloxacin hydrochloride and hydrocortisone. *J Chil Chem Soc.* 2013;58(3):1892–8.
- [9] Elgizawy SM, Hassan NY, Lotfy HM, Saleh SS. Comparative study of RP-HPLC versus TLC-spectrodensitometric methods applied for binary mixtures of fluoroquinolones and corticosteroids. *Acta Chromatogr.* 2014;26(3):439–56.
- [10] Guideline IHT. Validation of analytical procedures: text and methodology. Q2 (R1). 2005;1(20):05.
- [11] El-Saharty YS, El-Ragehy NA, Abdel-Monem HM, Abdel-Kawy MI. Stability-indicating methods for the determination of pipazethate HCl in the presence of its alkaline degradation product. *J Adv Res.* 2010;1(1):71–8.
- [12] Pharmacopoeia B. The stationary office on behalf of the medicines and healthcare products Regulatory Agency. Vol. 669, London, UK; 2009.
